# Supplementary material for: Resina, corcho y frutos forestales
Source: Royal Society of Chemistry journal article supplement (doi:10.1039/d3dt00598d), 1985-01-01
Supplement: d3dt00598d1.pdf [file d3dt00598d1.pdf]

# Supplementary data

## Structure-evolved YbBiO<sub>3</sub> perovskite for highly formate-selective CO<sub>2</sub> electroreduction

Jiaying Yan<sup>a</sup>, Xuanyu Wang<sup>a</sup>, Yayu Guan<sup>a</sup>, Yuyu Liu<sup>a,\*</sup>, Linlin Wang<sup>a</sup>, Qinsi Shao<sup>a,\*</sup>, and  
Qiu Huang<sup>a</sup>

<sup>a</sup> Institute for Sustainable Energy, College of Sciences, Shanghai University, Shangda Road  
99, Baoshan, Shanghai 200444, China

E-mail: liuyuyu@shu.edu.cn; liuyuyu2014@126.com

## Content

Fig. S1. Schematic illustration of the material synthesis process.

Fig. S2. (a) XRD pattern of Bi<sub>2</sub>O<sub>3</sub> NPs, SEM images of (b) Bi<sub>2</sub>O<sub>3</sub> NPs, (c) Bi<sub>2</sub>O<sub>3</sub> NPs after electroreduction.

Fig. S3. LSV curves of Bi<sub>2</sub>O<sub>3</sub> NPs, YBO@600 and YBO@800 in 0.1M KHCO<sub>3</sub> saturated with Ar.

Fig. S4. (a)  $FE_{CO}$  diagram of Bi<sub>2</sub>O<sub>3</sub> NPs, YBO@600 and YBO@800 at varied applied potentials. (b)  $FE_{H_2}$  of Bi<sub>2</sub>O<sub>3</sub> NPs, YBO@600 and YBO@800 at varied applied potentials.

Fig. S5. Current density of Bi<sub>2</sub>O<sub>3</sub> NPs, YBO@600 and YBO@800 at varied applied potentials.

Fig. S6. The  $FE_{formate}$  and current density during the stability test of Bi<sub>2</sub>O<sub>3</sub> NPs in H-type cell at -0.9 V<sub>RHE</sub>.

Fig. S7. XRD pattern of YBO@800 catalyst after 80h stability test.

Fig. S8. Installation diagram of flow-cell.

Fig. S9. Pictures of flow-cell system.

Fig. S10. LSV curve of the YBO@800 catalyst in the flow-cell with CO<sub>2</sub> injection.

Fig. S11. The  $FE_{formate}$  and current density of the YBO@800 catalyst at different potentials in the flow-cell.

Fig. S12. (a) XRD pattern of YBO@600, SEM images of (b) YBO@600, (c) YBO@600 after electroreduction.

Fig. S13. Yb 4d XPS spectra of YBO@800 and e-YBO.

Fig. S14. CV curves of the catalysts at different sweep speeds: (a) YBO@800, (b) e-YBO.

Fig. S15. (a) N<sub>2</sub> adsorption–desorption isotherms of YBO@800, (b) e-YBO. (c) BET surface area of YBO@800 and e-YBO.

Fig. S16. EIS plots of Bi<sub>2</sub>O<sub>3</sub> NPs and YBO@600.

Table. S1. Inductively Coupled Plasma Optical Emission Spectrometer (ICP-OES) results for mole ratio of Bi and Yb in YBO@800.

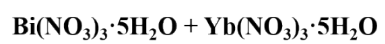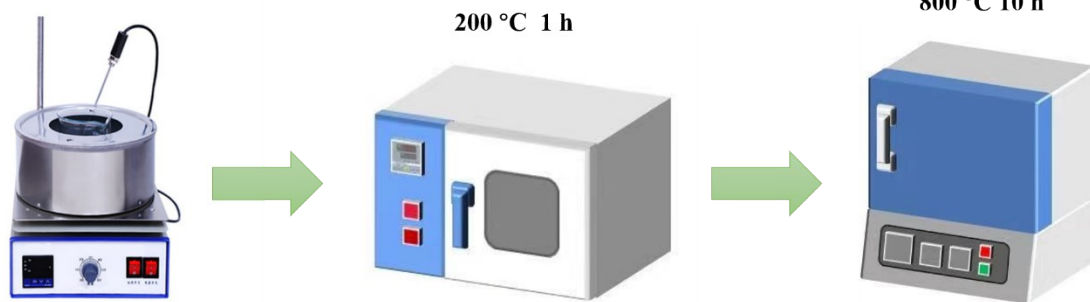

**Fig. S1.** Schematic illustration of the material synthesis process.

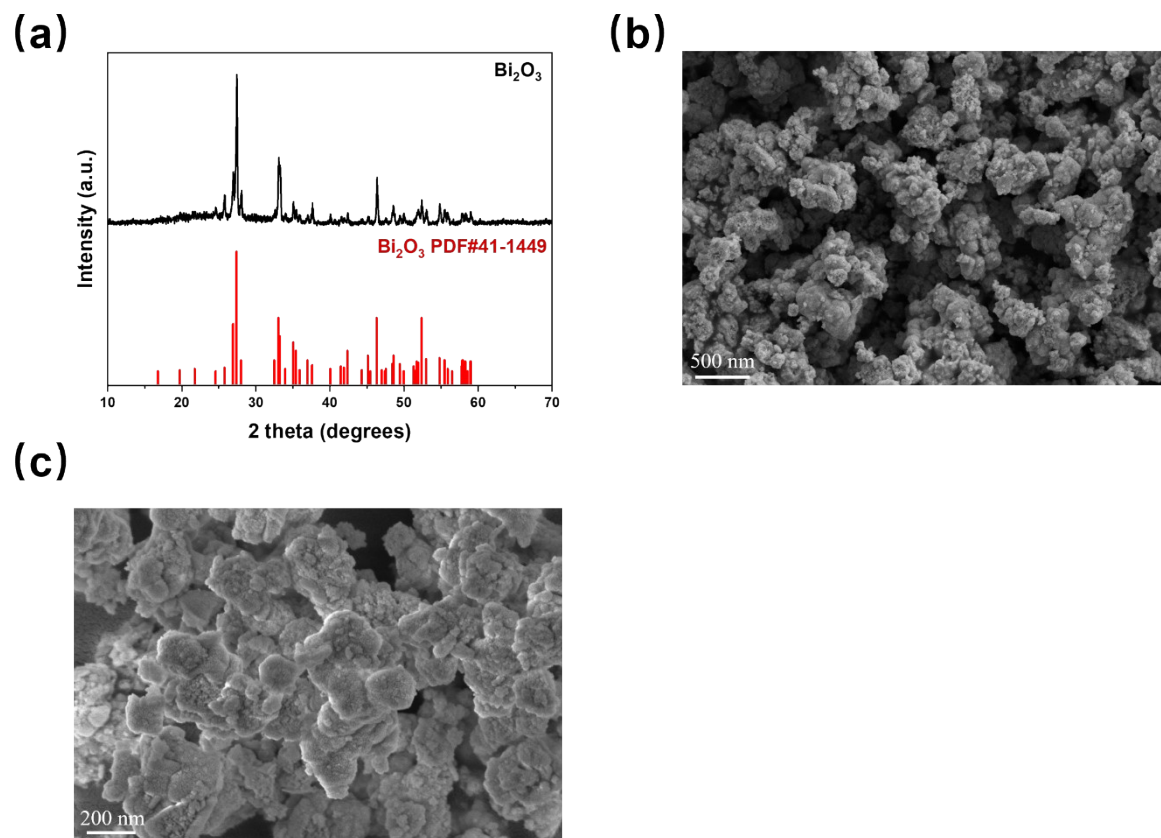

**Fig. S2.** (a) XRD pattern of  $\text{Bi}_2\text{O}_3$  NPs, SEM images of (b)  $\text{Bi}_2\text{O}_3$  NPs, (c)  $\text{Bi}_2\text{O}_3$  NPs after electroreduction.

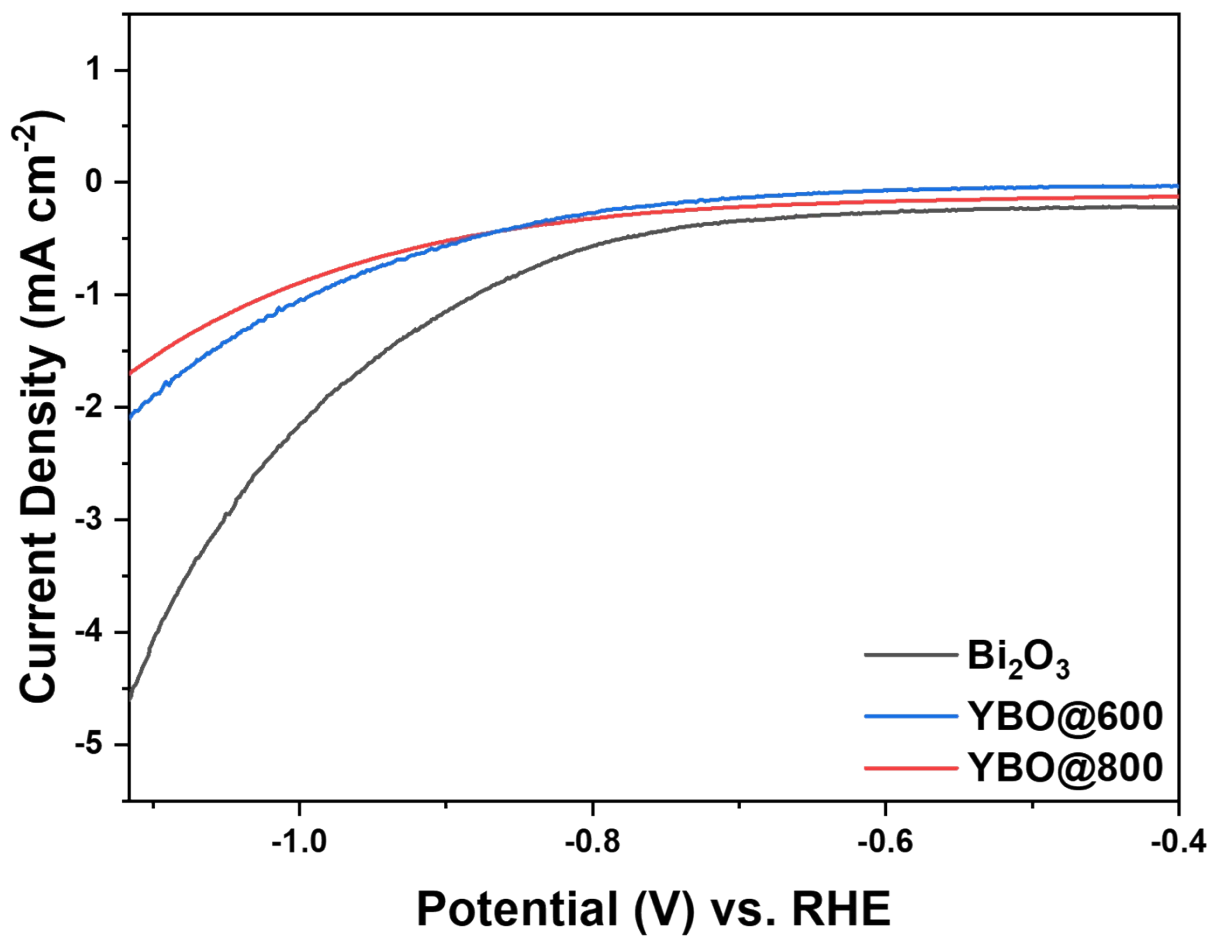

Fig. S3. LSV curves of Bi<sub>2</sub>O<sub>3</sub> NPs, YBO@600 and YBO@800 in 0.1M KHCO<sub>3</sub> saturated with Ar.

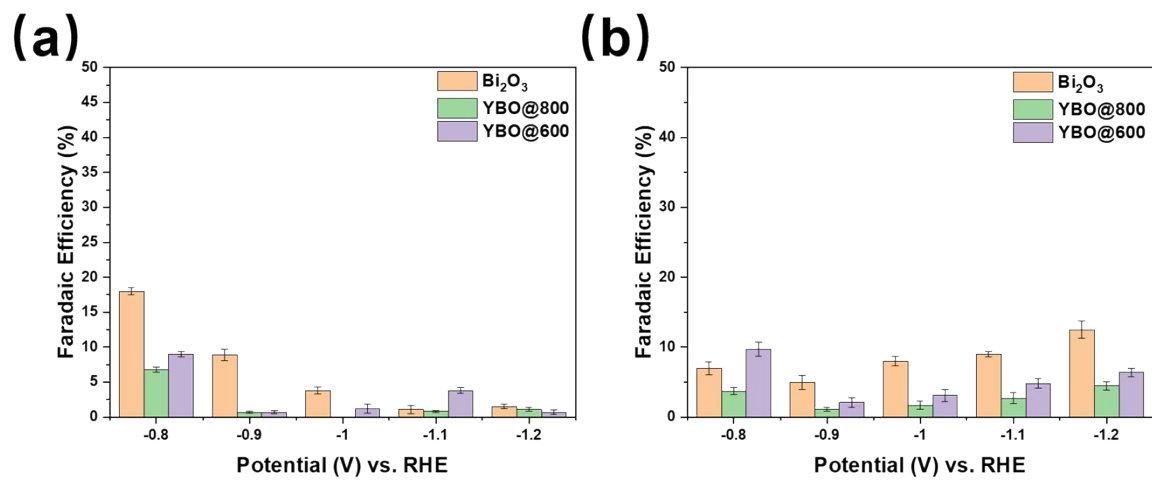

**Fig. S4.** (a)  $FE_{CO}$  diagram of Bi<sub>2</sub>O<sub>3</sub> NPs, YBO@600 and YBO@800 at varied applied potentials. (b)

$FE_{H_2}$  of Bi<sub>2</sub>O<sub>3</sub> NPs, YBO@600 and YBO@800 at varied applied potentials.

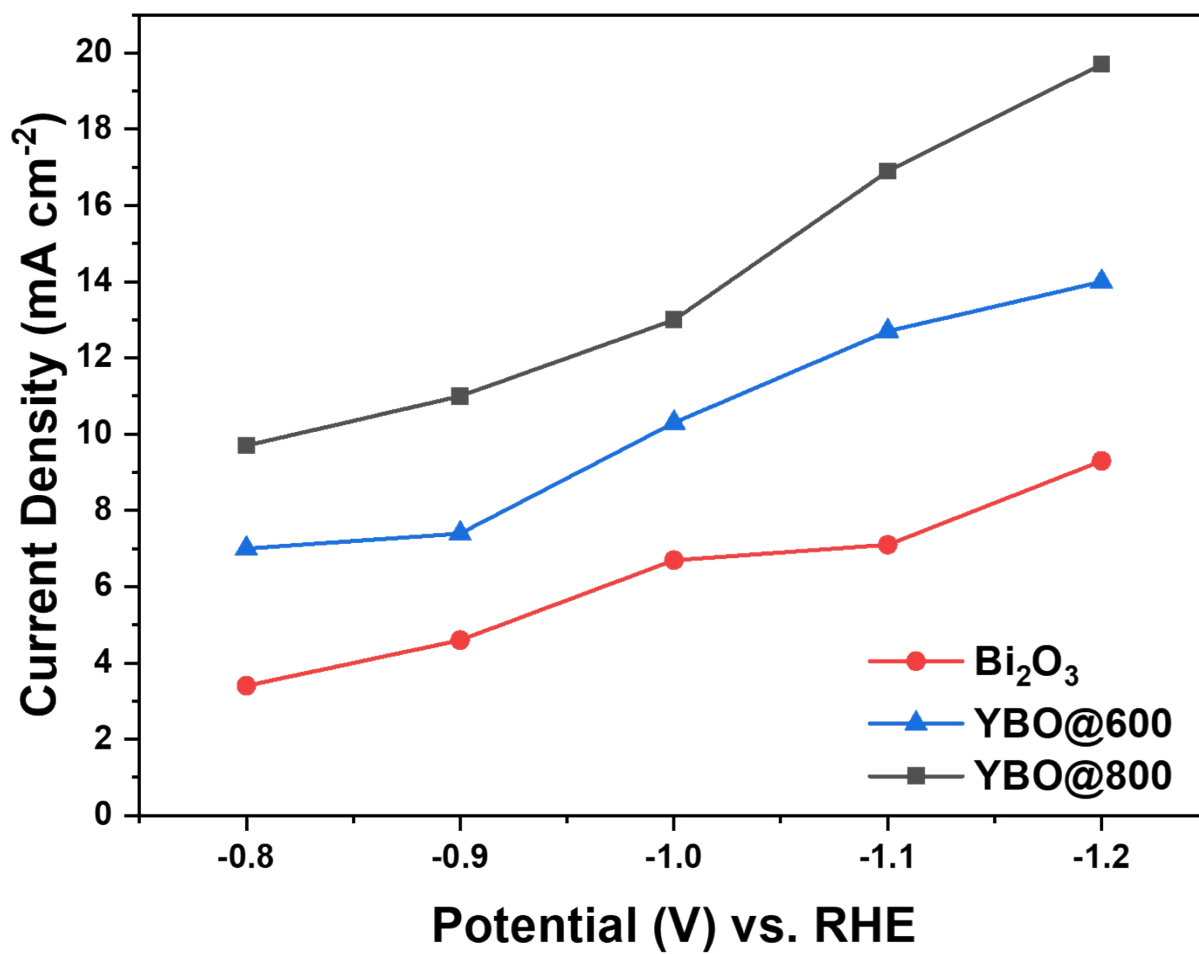

Fig. S5. Current density of Bi<sub>2</sub>O<sub>3</sub> NPs, YBO@600 and YBO@800 at varied applied potentials.

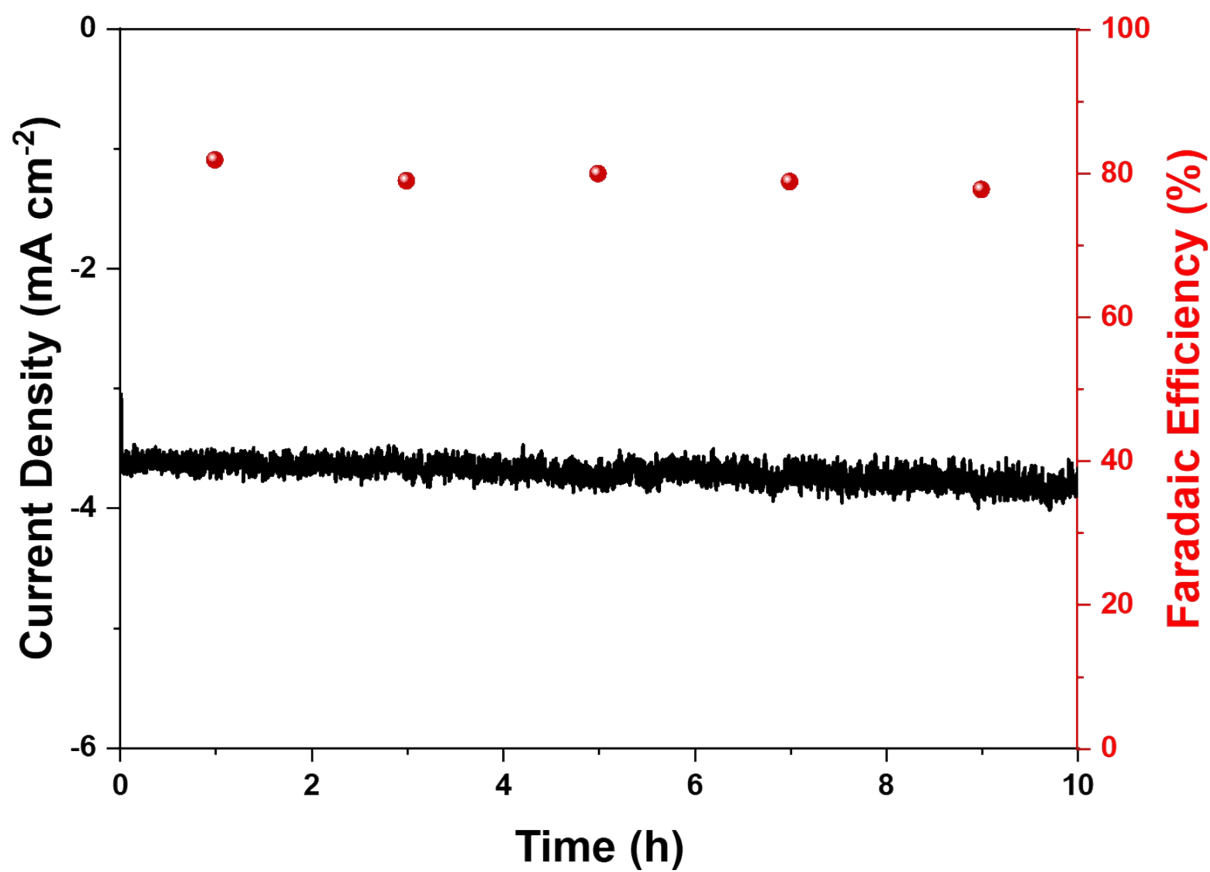

Fig. S6. The  $FE_{\text{formate}}$  and current density during the stability test of  $\text{Bi}_2\text{O}_3$  NPs in H-type cell at  $-0.9 V_{\text{RHE}}$ .



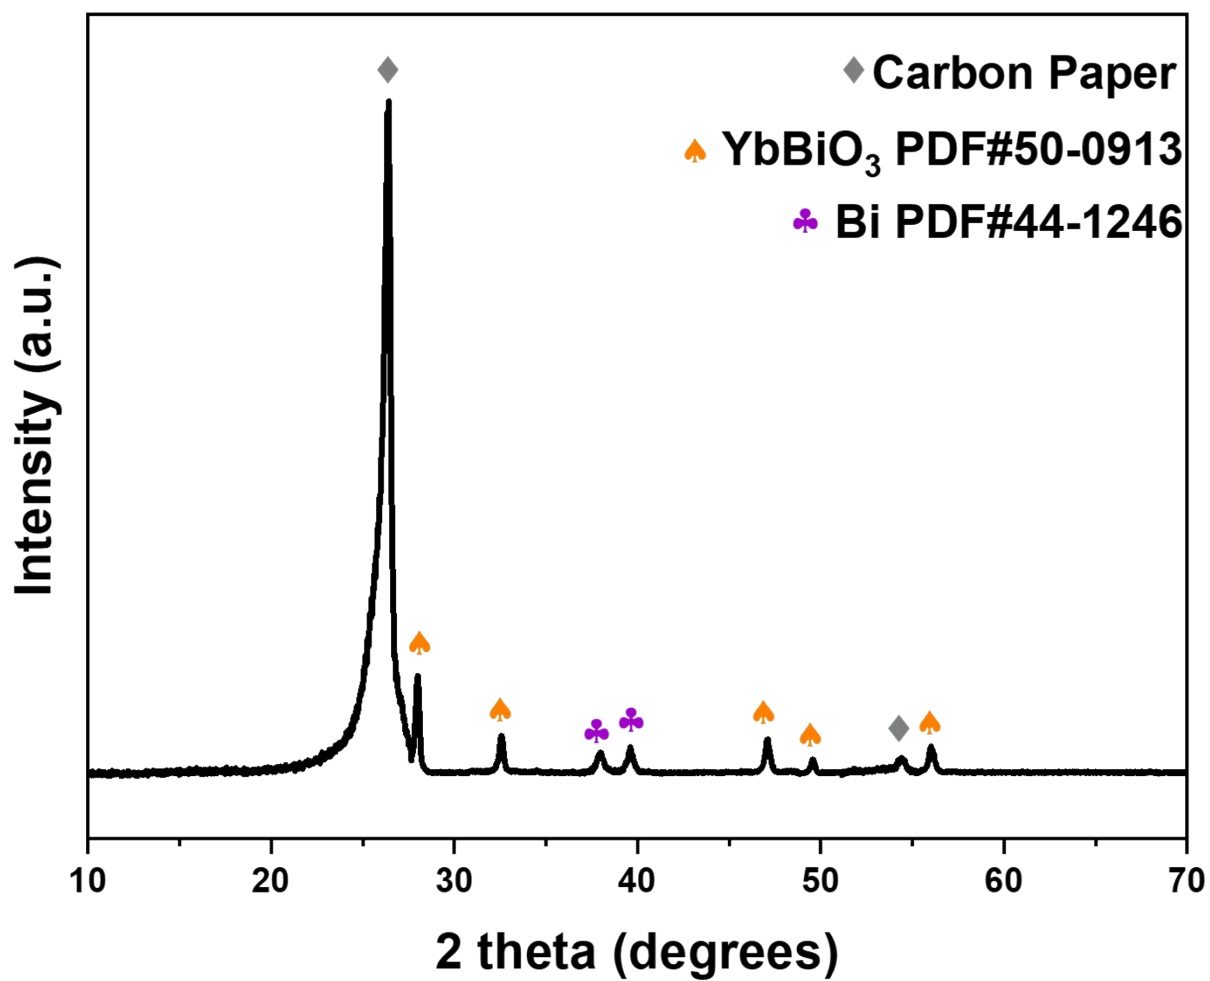

Fig. S7. XRD pattern of YBO@800 catalyst after 80h stability test.

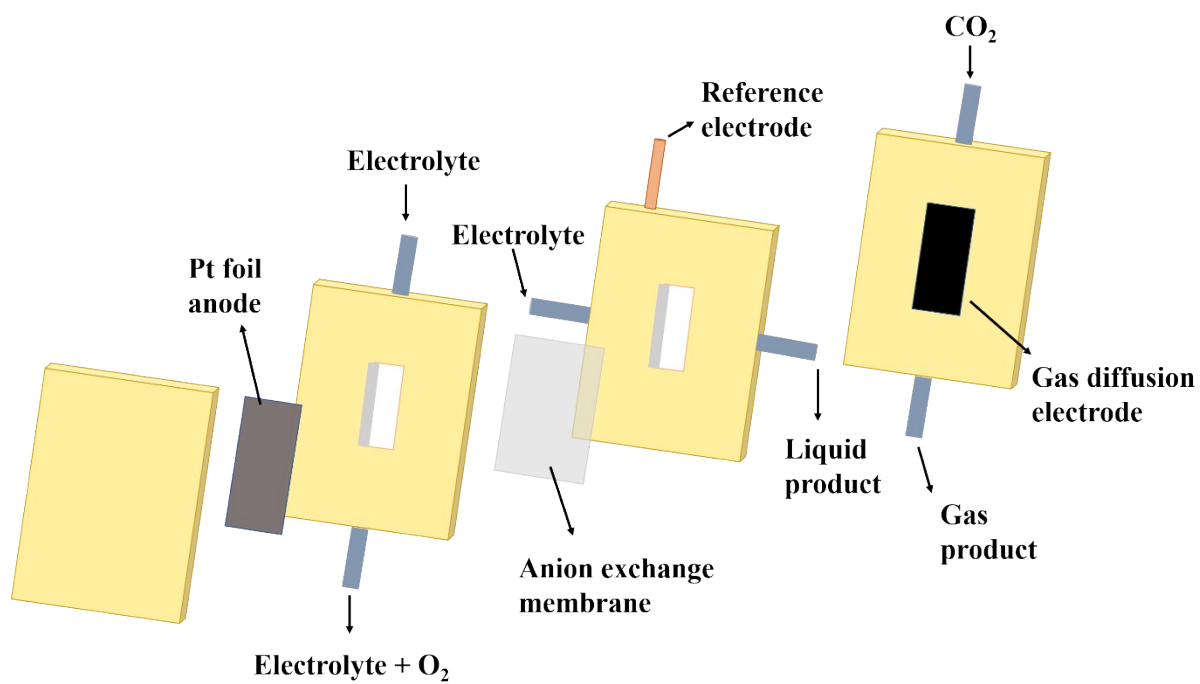

**Fig. S8.** Installation diagram of flow-cell.

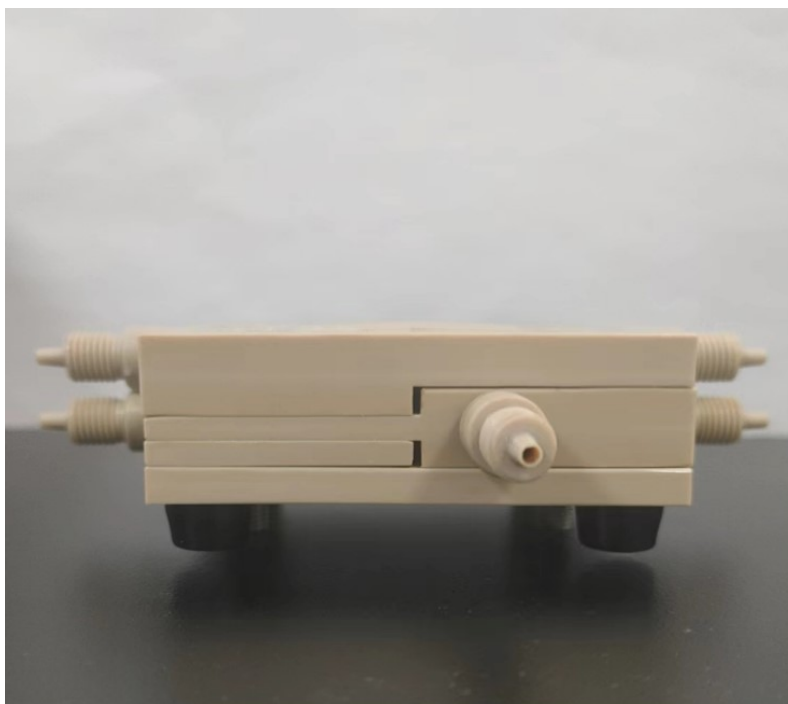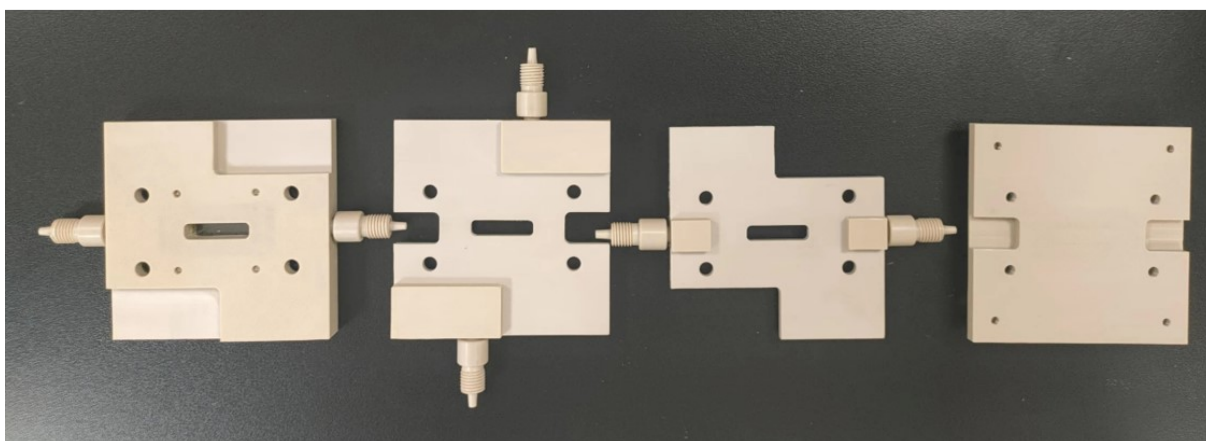

**Fig. S9.** Pictures of flow-cell system.

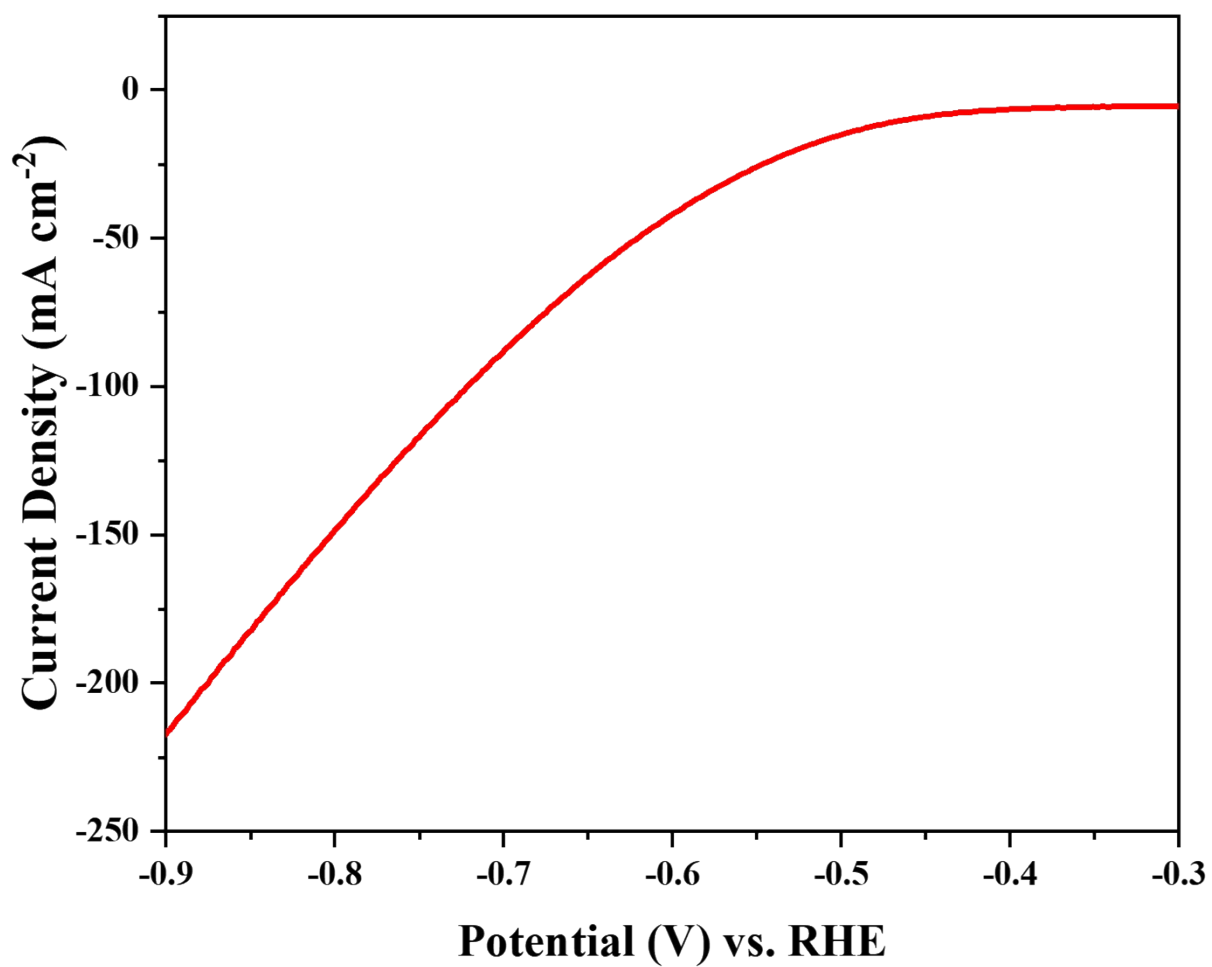

Fig. S10. LSV curve of the YBO@800 catalyst in the flow-cell with CO<sub>2</sub> injection.

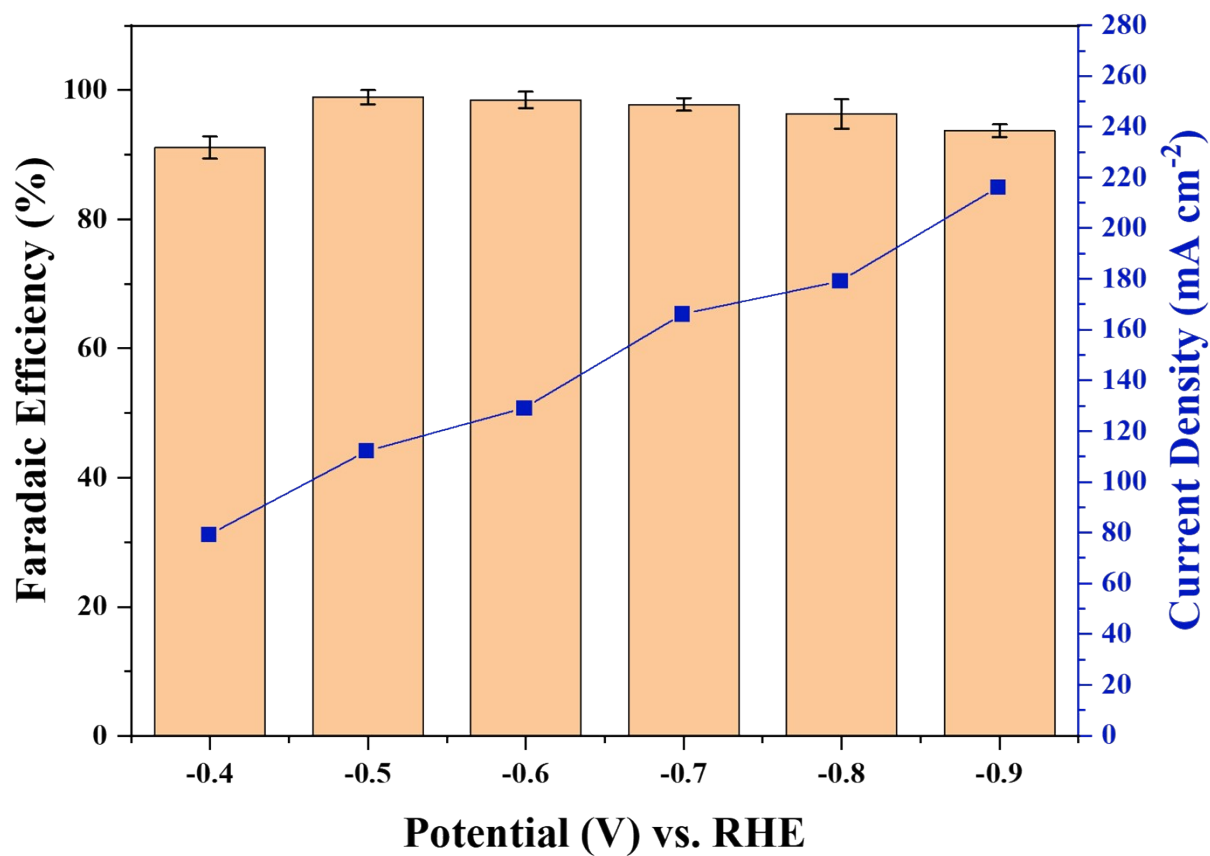

Fig. S11. The  $FE_{\text{formate}}$  and current density of the YBO@800 catalyst at different potentials in the flow-cell.

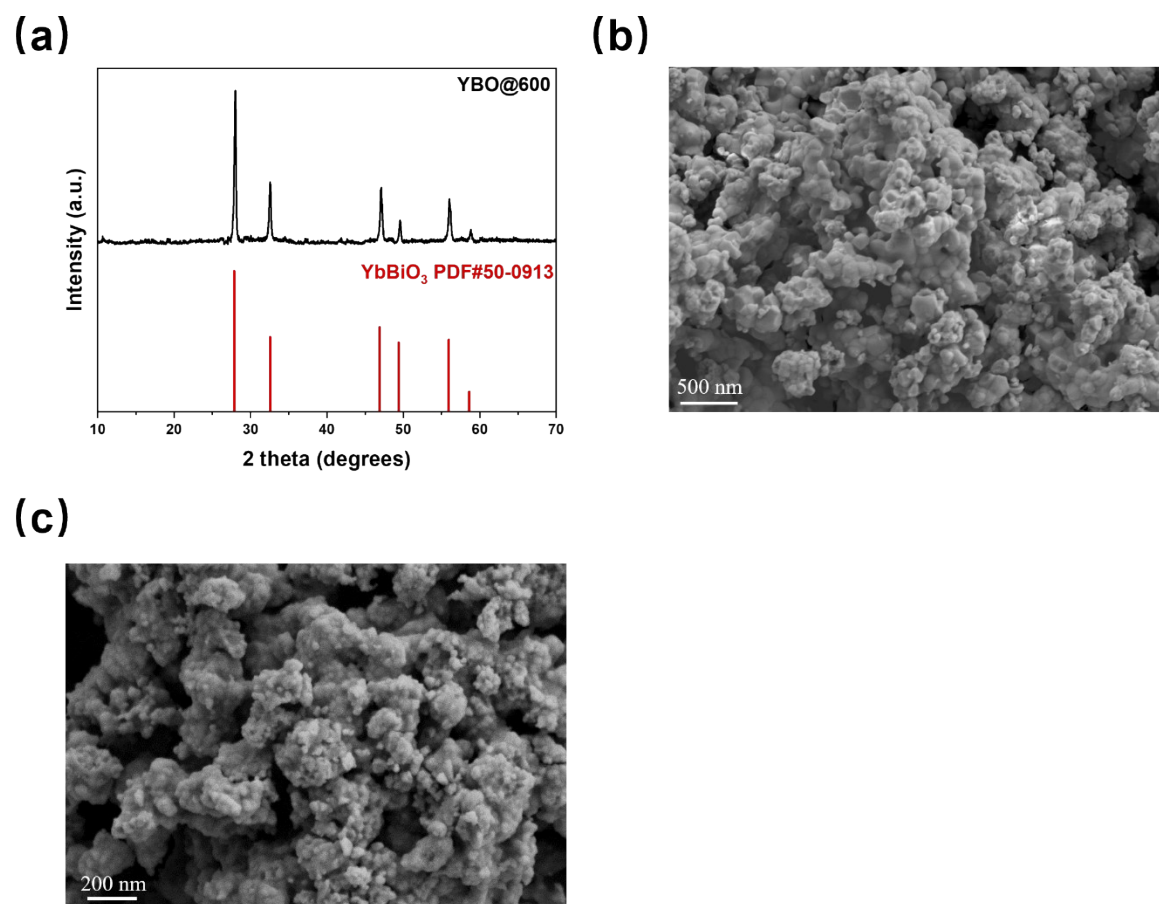

**Fig. S12.** (a) XRD pattern of YBO@600, SEM images of (b) YBO@600, (c) YBO@600 after electroreduction.

**(a)**

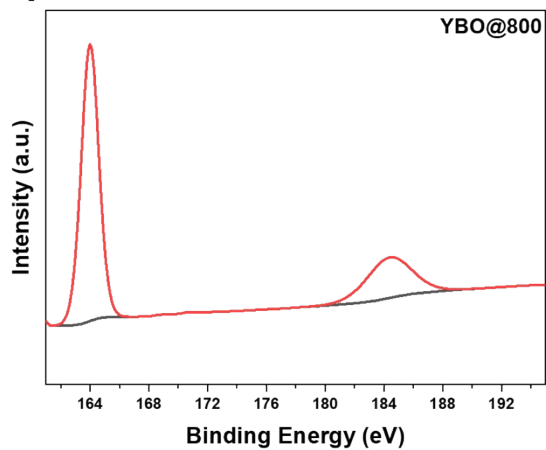

**(b)**

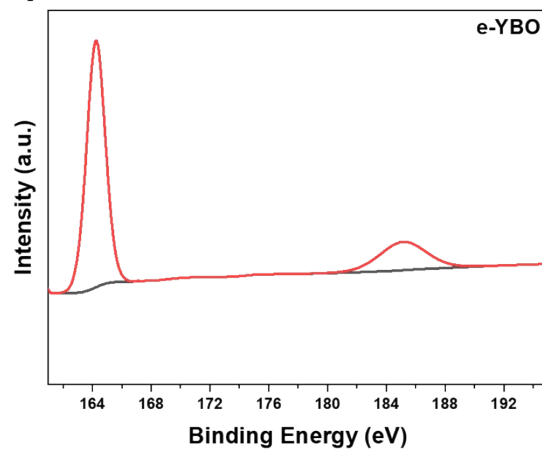

**Fig. S13.** Yb 4d XPS spectra of YBO@800 and e-YBO.

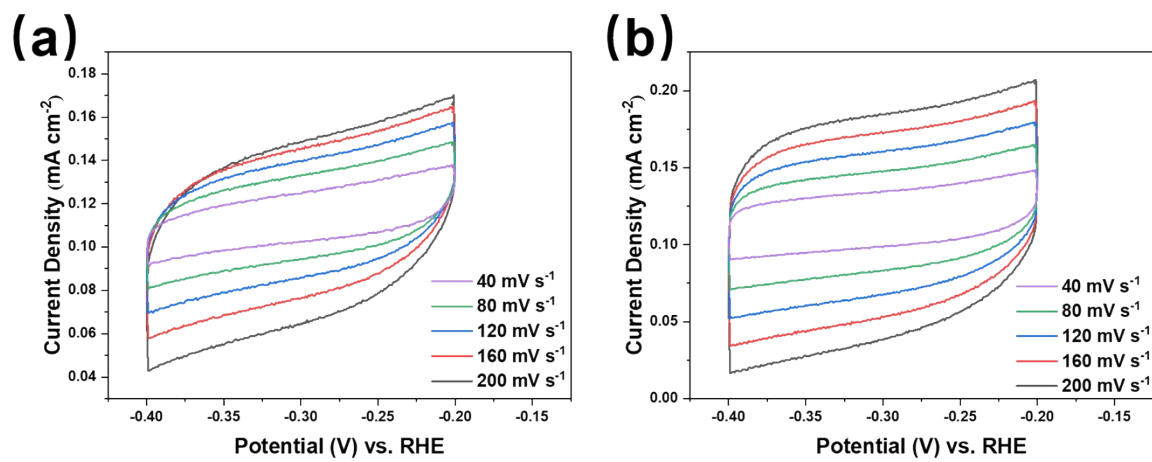

Fig. S14. CV curves of the catalysts at different sweep speeds: (a) YBO@800, (b) e-YBO.



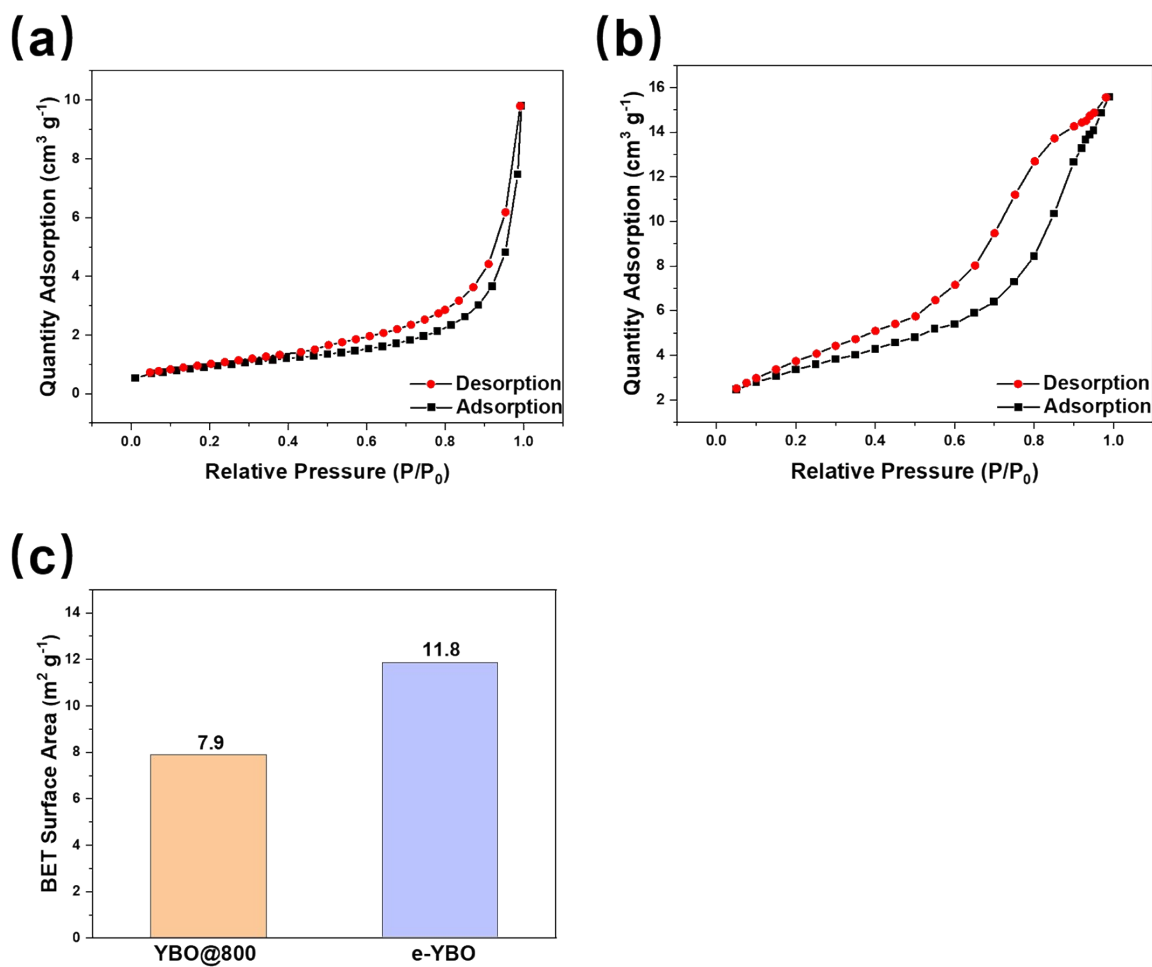

**Fig. S15.** (a) N<sub>2</sub> adsorption–desorption isotherms of YBO@800, (b) e-YBO. (c) BET surface area of YBO@800 and e-YBO.

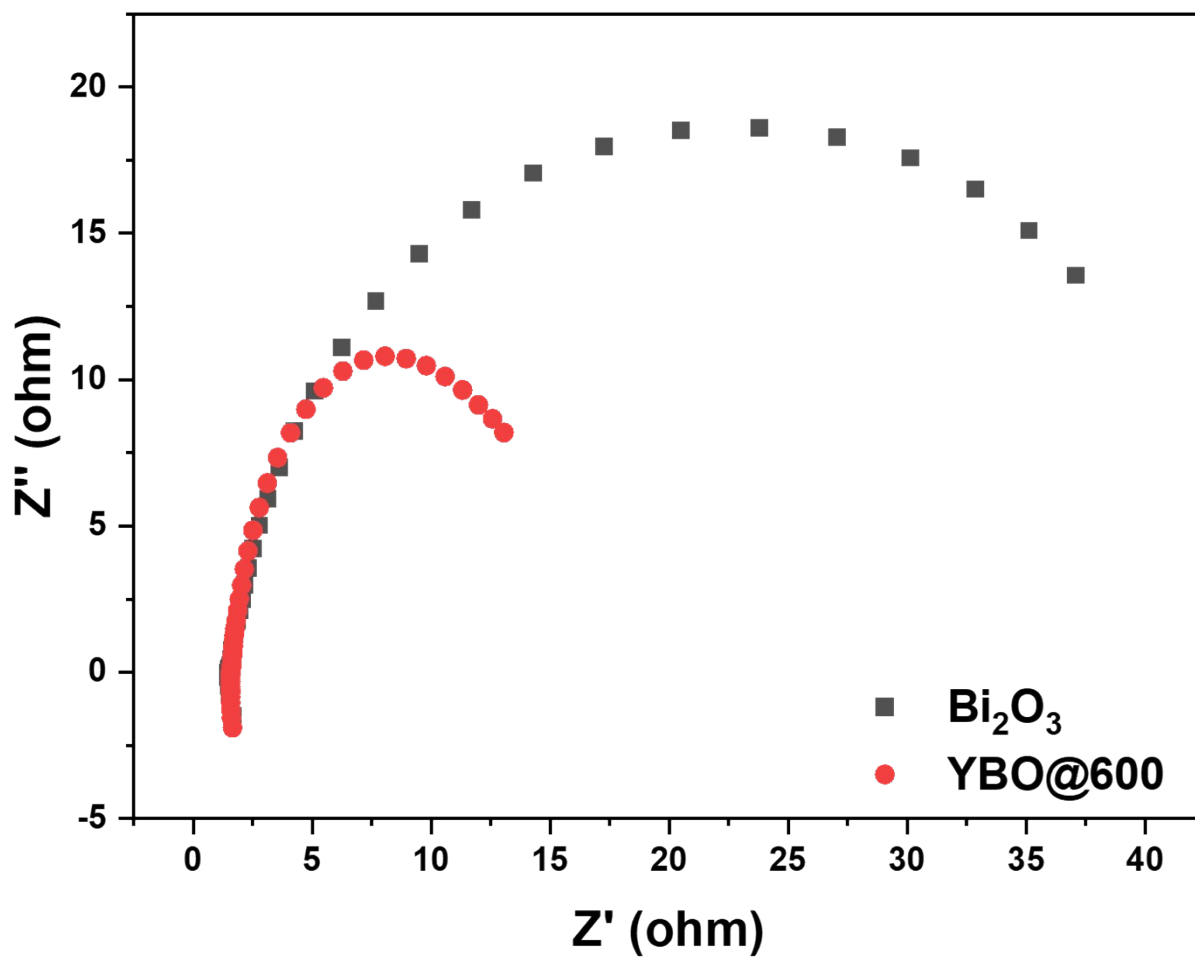

Fig. S16. EIS plots of  $\text{Bi}_2\text{O}_3$  NPs and YBO@600.

**Table. S1.** Inductively Coupled Plasma Optical Emission Spectrometer (ICP-OES) results for mole ratio of Bi and Yb in YBO@800.

| Sample  | ICP-OES<br>(mole ratio, Bi:Yb) |
|---------|--------------------------------|
| YBO@800 | 1:0.97                         |
